# Supplementary material for: An Antivirulence Approach for Preventing Cryptococcus neoformans from Crossing the Blood-Brain Barrier via Novel Natural Product Inhibitors of a Fungal Metalloprotease
Source: PubMed Central journal article supplement (PMC7374060; doi:10.1128/mbio.01249-20), 2020-07-21

**A**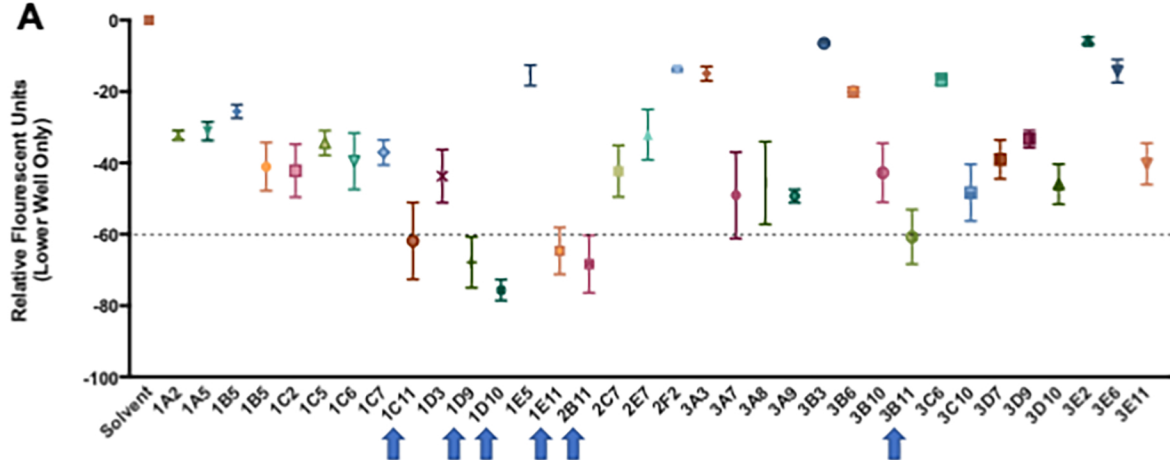**B**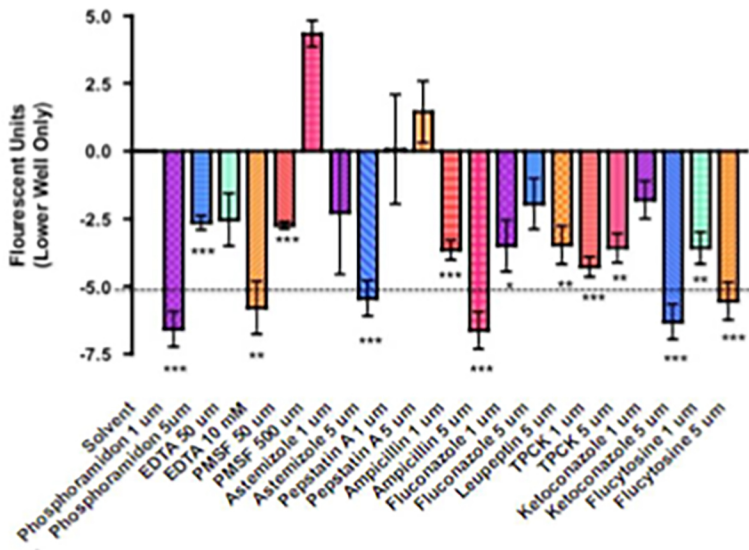

Supplement: mBio.01249-20-sf001.pdf [file mBio.01249-20-sf001.pdf]
